# Supplementary material for: Utility of Alternative Promoters for Foreign Gene Expression Using the Baculovirus Expression Vector System
Source: MDPI journal article supplement (doi:10.3390/v14122670), 2022-11-29
Supplement: s1 [file s1]

# **Utility of alternative promoters for foreign gene expression using the baculovirus expression vector system: supplementary information**

Mark R. Bruder and Marc G. Aucoin\*

Department of Chemical Engineering, University of Waterloo, Waterloo, ON N2L 3G1, Canada

\* Correspondence: maucoin@uwaterloo.ca; Tel.: +1-519-888-4567

The following contains: Figure S1: AcMNPV ORFs categorized according to transcript abundance; Figure S2: AcMNPV ORFs promoter motifs categorized according to transcript abundance; Figure S3: Sequences flanking the late gene promoter motif; Figure S4: Sequences flanking the translation initiation site; Table S1: Primers used in this study; Table S2: Promoters on commercially available BEVS transfer plasmids; Table S3: Position and sequence of putative upstream octamer matches in relation to TAAG motif; Table S4: Position and sequence of putative downstream octamer matches in relation to TAAG motif.

Figure S1

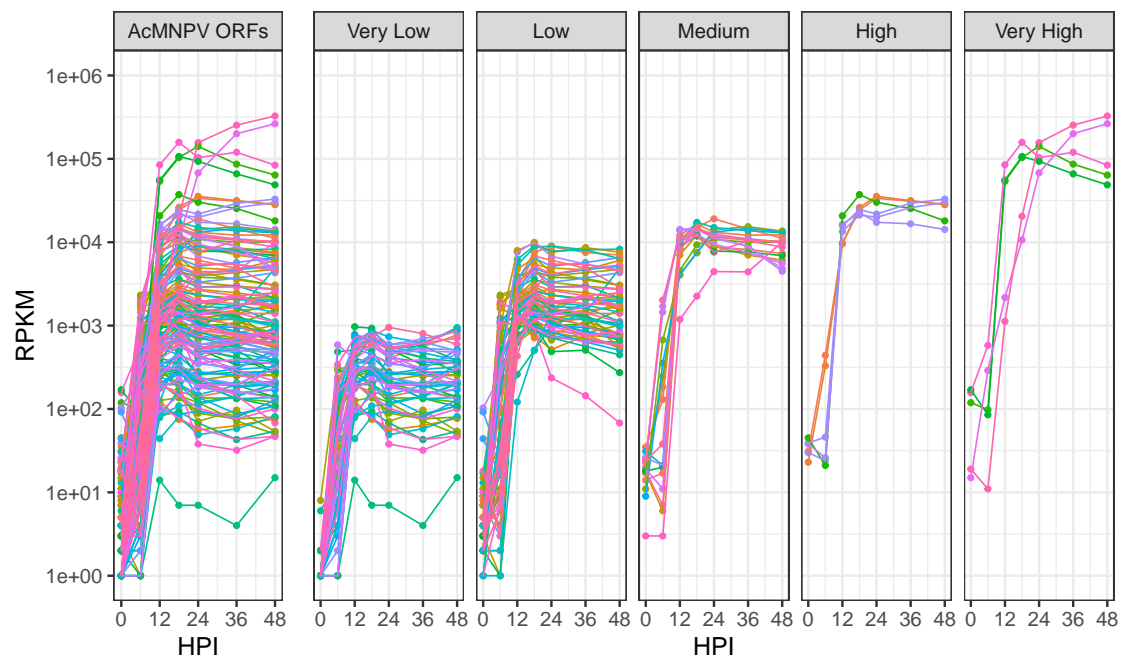

Figure S1: AcMNPV ORFs categorized according to transcript abundance.

**Figure S2**

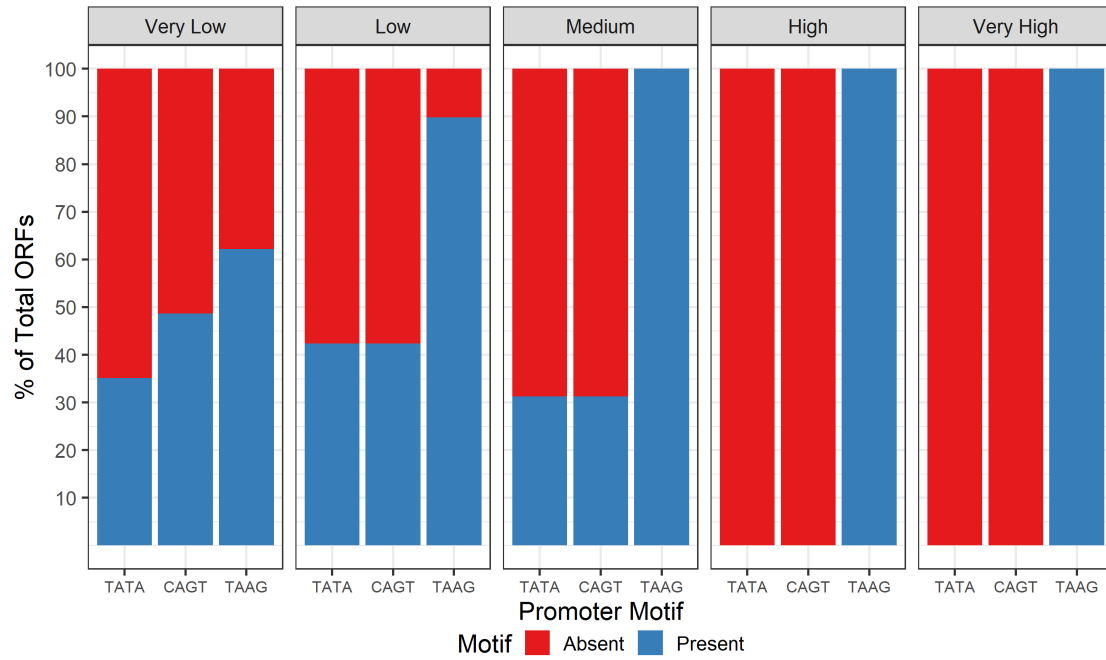

Figure S2: Proportion of AcMNPV ORFs with different promoter motifs, categorized according to transcript abundance. TATA and CAGT motifs are recognized and transcribed by the host RNAP II whereas the TAAG motif is recognized and transcribed by the viral RNAP.

Figure S3

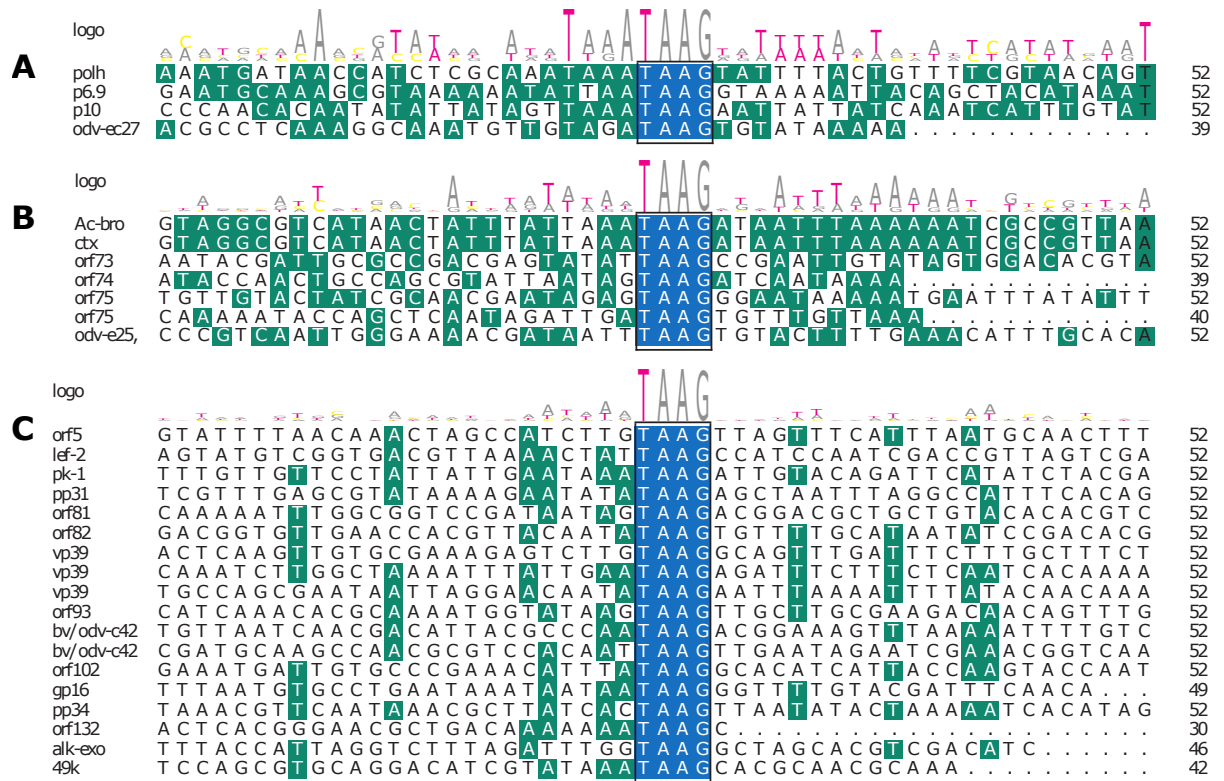



Figure S4

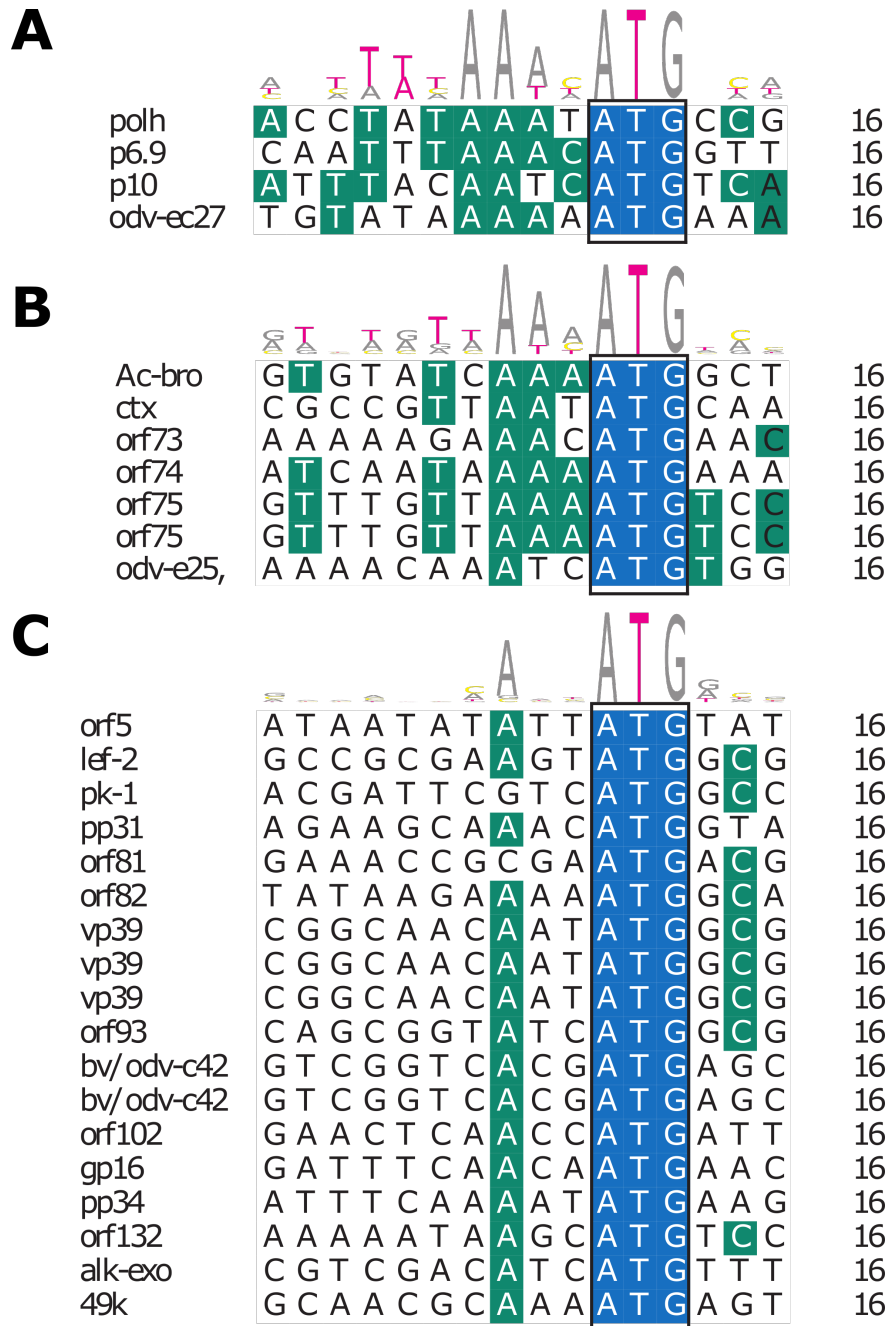



Table S1: Primers used in this study

| Plasmid Construct | Sequence (5'-3')                                              | Description            |
|-------------------|---------------------------------------------------------------|------------------------|
| Promoter-GFP      | atggtgagtgatgattaagccc                                        | pHR-GFP (promoterless) |
|                   | cgctggactggcatgaac                                            |                        |
|                   | caccgaagttcatgccagtcagcgccacttgcgagttttgcag                   | vp39 promoter          |
|                   | cttcattctcgggcttaatcacactcaccat attgttgccgttataaatatgg        | orf75 promoter         |
|                   | caccgaagttcatgccagtcagcgagcgaagaggagaacaaca                   | 38k promoter           |
|                   | cttcattctcgggcttaatcacactcaccat tttacaaaacttatcaatctattgagc   |                        |
|                   | caccgaagttcatgccagtcagcg tcgtacagctcaggttacagtttg             | 39k promoter           |
|                   | gatcttcattctcgggcttaatcacactcaccat aatgtacaaaaatggaccagttacg  |                        |
|                   | caccgaagttcatgccagtcagcg cccccaaaaattgcac                     | ctx promoter           |
|                   | gatcttcattctcgggcttaatcacactcaccat gttgtctctgttaaaccctttgaaac |                        |
|                   | caccgaagttcatgccagtcagcg tcgcccagcatca                        | gp64 promoter          |
|                   | cttcattctcgggcttaatcacactcaccat attaacggcgatttttaattatc       |                        |
|                   | caccgaagttcatgccagtcagcg ggtagttccagatagccatcg                | $\Delta$ p10 promoter  |
|                   | cttcattctcgggcttaatcacactcaccat cttgcttggtgttccttattga        |                        |
|                   | gtatattaattaaaatac atggtgagtgatgattaagccc                     | p6.9 promoter          |
|                   | ggcttaatcacactcaccat gtattttaattataatacaaatgatttgataataatc    |                        |
| Promoter-SEAP     | caccgaagttcatgccagtcagcg aaattccgttttgcgacg                   | pHR-promoter fwd       |
|                   | catctcgggcttaatcacactcaccat gtttaaatgtgtaatttatgtagctgta      |                        |
|                   | caccgaagttcatgccagtcagcgtaggcctttgaattccg                     | SEAP gene              |
|                   | ggcttaatcacactcaccat atttatagggtttttattacaaaactgttacgaaaacag  |                        |
|                   | ggcgcccatgaatcgtttttaaaataac                                  | vp39 rev               |
|                   | atgcttctcttattgctgctgctggcctgag                               |                        |
|                   | gtatttttaaaaacgattcatggcgccgcc ttatgtctgctcgaagcgcc           | orf75 rev              |
|                   | caggccagcagcagcaataagagaagcat attgttgccgttataaatatgg          |                        |
|                   | caggccagcagcagcaataagagaagcat tttacaaaacttatcaatctattgagc     | 38k rev                |
|                   | caggccagcagcagcaataagagaagcat aatgtacaaaaatggaccagttacg       |                        |
|                   | caggccagcagcagcaataagagaagcat gtttgcttctgttaaaccctttgaaac     | 39k rev                |
|                   | caggccagcagcagcaataagagaagcat attaacggcgatttttaattatc         |                        |
| qPCR primers      | caggccagcagcagcaataagagaagcat cttgcttggtgttccttattga          | ctx rev                |
|                   | caggccagcagcagcaataagagaagcat gtattttaattataatacaaatgatttg    | gp64 rev               |
|                   | caggccagcagcagcaataagagaagcat gtttaaatgtgtaatttatgtagctgta    | $\Delta$ p10 rev       |
|                   | caggccagcagcagcaataagagaagcat atttatagggtttttattacaaaactg     | p6.9 rev               |
|                   | cgacgttgctttttgatcct                                          | polh rev               |
|                   | gcaacgacaagccatcagta                                          |                        |
| qPCR primers      | tctacgacatcaggttcgacgg                                        | 28S                    |
|                   | tccttcttggcctttaggtgg                                         | GFP                    |
|                   | agtaccagatgactacagc                                           |                        |
|                   | ggatctcgtatttcattgtctcc                                       | SEAP                   |



Table S2: Promoters on commercially available BEVS transfer plasmids

| System                   | Family                 | Plasmid                   | Expression | Promoter(s)  | polyA                  |
|--------------------------|------------------------|---------------------------|------------|--------------|------------------------|
| Transposition            | pFastbac <sup>TM</sup> | pFastbac-1, HT            | single     | polh         | SV40                   |
|                          |                        | pFastbac Dual             | dual       | polh/p10     | SV40, HSV TK           |
|                          | MultiBac <sup>TM</sup> | pIDC, pIDK, pIDS          | single‡‡   | polh/p10     | SV40, HSV TK           |
|                          |                        | pFL, pKL, pSPL, pUCDM     | dual       | polh/p10     | SV40, HSV TK           |
|                          |                        | pACEBac1, pACEBac2        | single‡‡   | polh/p10     | SV40, HSV TK           |
| Homologous Recombination | pBAC <sup>TM</sup>     | pBAC-1/2/3                | single     | polh         | n/a                    |
|                          |                        | pBAC-4x                   | multi      | polh/p10     | synthetic              |
|                          |                        | pBAC-5                    | single     | gp64         | n/a                    |
|                          |                        | pBAC-6†                   | single     | gp64         | n/a                    |
|                          |                        | pBACsurf-1‡               | single     | polh         | n/a                    |
|                          | pIEx/Bac <sup>TM</sup> | pIEx/Bac-1/3/4/5          | single     | hr5 -ie1-p10 | ie1                    |
|                          | pTriEx <sup>TM</sup>   | pTriEx-1.1/2/3/4/5/6/7    | single     | p10          | rabbit $\beta$ -globin |
|                          | pAB <sup>TM</sup>      | pAB-6xHis/GST/MBP         | single     | polh         | n/a                    |
|                          |                        | pAB-bee/bee-8xHis/bee-FH† | single     | polh         | n/a                    |

†: secretion signal included; ‡: gp64 fusion for surface display; ‡‡: contains multiplication element for multigene compatability

Table S3: Position and sequence of putative upstream octamer matches in relation to TAAG motif.

| ORF                    | Start | End | Sequence  |
|------------------------|-------|-----|-----------|
| polh                   | 109   | 102 | ATTGTAAT  |
| p6.9                   | 209   | 202 | ATTACAAT  |
| p6.9                   | 152   | 145 | ATTGCAAG  |
| p6.9                   | 131   | 124 | ATTACAAT  |
| p6.9                   | 27    | 20  | AATGCAAA  |
| Ac-bro                 | 203   | 196 | ATTGCCAC  |
| ctx                    | 203   | 196 | ATTGCCAC  |
| orf73                  | 120   | 113 | ATTGAAAC  |
| orf73                  | 90    | 83  | ATTGAAAA  |
| orf73                  | 34    | 27  | ATTGCAAA  |
| orf74                  | 115   | 108 | ATTGCATA  |
| orf74                  | 22    | 15  | ACTGCCAG  |
| orf74                  | 7     | 0   | ATAGTAAG  |
| orf75                  | 61    | 54  | ATCGCAAT  |
| orf75                  | 19    | 12  | ATCGCAAC  |
| orf75                  | 135   | 128 | ATTATAAG  |
| odv-e25                | 96    | 89  | ATTGCGAA  |
| orf5                   | 185   | 178 | TTTGCAATG |
| orf5                   | 181   | 174 | CATGCAAG  |
| orf5                   | 160   | 153 | ATTGCGAT  |
| orf5                   | 7     | 0   | CTTGTAAG  |
| Continued on next page |       |     |           |

**Table S3 – continued from previous page**

| ORF        | Start | End | Sequence |
|------------|-------|-----|----------|
| lef-2      | 115   | 108 | ATTGTAAT |
| pk-1       | 153   | 146 | TTGGCAAG |
| pp31       | 222   | 215 | ATTGCAGG |
| pp31       | 165   | 158 | ATTGCACG |
| pp31       | 116   | 109 | AATACAAG |
| orf81      | 89    | 82  | AATGCAAT |
| orf81      | 36    | 29  | ATTTCAAA |
| orf81      | 7     | 0   | ATAGTAAG |
| orf82      | 200   | 193 | ATTTCATG |
| orf82      | 75    | 68  | ATTTCAAT |
| vp39       | 203   | 196 | CTTGCGAG |
| vp39       | 72    | 65  | ATTTCAAT |
| vp39       | 7     | 0   | CTTGTAAG |
| vp39       | 145   | 138 | ATTGCAAG |
| vp39       | 223   | 216 | CTTGTAAG |
| vp39       | 97    | 90  | ATTGCAAG |
| orf93      | 215   | 208 | AGTGCATG |
| orf93      | 110   | 103 | GTTGCAAG |
| bv/odv-c42 | 150   | 143 | GTCGCAAG |
| bv/odv-c42 | 72    | 65  | GTTGCAAA |
| bv/odv-c42 | 159   | 152 | GTTGCAAA |
| bv/odv-c42 | 27    | 20  | GATGCAAG |
| orf102     | 71    | 64  | ATTGAAAT |
| gp16       | 170   | 163 | ATAGCAAC |

Continued on next page

**Table S3 – continued from previous page**

| ORF     | Start | End | Sequence |
|---------|-------|-----|----------|
| gp16    | 124   | 117 | GTTGCAAG |
| pp34    | 147   | 140 | CTTGCAAA |
| pp34    | 103   | 96  | ATGGCAAA |
| orf132  | 142   | 135 | TTTGCTAG |
| alk-exo | 52    | 45  | AATGCAAT |
| alk-exo | 46    | 39  | ATTGGAAC |
| 49k     | 155   | 148 | AATGCAAT |

Table S4: Position and sequence of putative downstream octamer matches in relation to TAAAG motif.

| ORF                    | Start | End | Sequence  |
|------------------------|-------|-----|-----------|
| p6.9                   | 99    | 92  | ATTAGGAA  |
| p6.9                   | 47    | 40  | ATTTGGGA  |
| p6.9                   | 8     | 1   | ATTAATAA  |
| p10                    | 105   | 98  | ATTCAGAA  |
| p10                    | 72    | 65  | ACTATGAA  |
| p10                    | 64    | 57  | ATTATGCA  |
| odv-ec27               | 170   | 163 | AGTAGTAA  |
| odv-ec27               | 37    | 30  | TTTATGAA  |
| orf73                  | 141   | 134 | TTTAGAAA  |
| orf73                  | 100   | 93  | ATAAGGAC  |
| orf74                  | 208   | 201 | AGTAGAAA  |
| orf74                  | 64    | 57  | TTTAGCAA  |
| orf74                  | 8     | 1   | AATAGTAA  |
| orf75                  | 203   | 196 | AAAAGGAA  |
| orf75                  | 132   | 125 | ATAAGTAA  |
| orf75                  | 129   | 122 | AGTAAGAA  |
| odv-e25                | 160   | 153 | ATTATGTA  |
| odv-e25                | 119   | 112 | GTTTCGGAA |
| odv-e25                | 96    | 89  | ATTGCGAA  |
| odv-e25                | 21    | 14  | ATTGGGAA  |
| lef-2                  | 102   | 95  | TTTACGAA  |
| Continued on next page |       |     |           |

**Table S4 – continued from previous page**

| ORF     | Start | End | Sequence |
|---------|-------|-----|----------|
| pp31    | 141   | 134 | ATTCGGAC |
| orf81   | 209   | 202 | ATTATCAA |
| orf81   | 8     | 1   | AATAGTAA |
| orf82   | 90    | 83  | TTTAAGAA |
| vp39    | 182   | 175 | GTTTGGAA |
| vp39    | 130   | 123 | AATAGGTA |
| vp39    | 64    | 57  | ATTAGGAA |
| vp39    | 134   | 127 | GTTTGGAA |
| vp39    | 82    | 75  | AATAGGTA |
| vp39    | 16    | 9   | ATTAGGAA |
| orf93   | 8     | 1   | ATAAGTAA |
| orf102  | 147   | 140 | AGTTGGAA |
| orf102  | 115   | 108 | ATGAGCAA |
| orf102  | 49    | 42  | ATTTGTAA |
| gp16    | 183   | 176 | ATTTTGAA |
| gp16    | 132   | 125 | ATTAACAA |
| pp34    | 60    | 53  | ATTAACAA |
| alk-exo | 143   | 136 | ATCAAGAA |
| alk-exo | 136   | 129 | ACTAAGAA |
| alk-exo | 92    | 85  | GTTGGGAA |
| alk-exo | 47    | 40  | AATTGGAA |
| alk-exo | 22    | 15  | ATTAGGTC |
| alk-exo | 9     | 2   | ATTTGGTA |
| 49k     | 210   | 203 | ATTAATAA |

Continued on next page

**Table S4 – continued from previous page**

| ORF | Start | End | Sequence |
|-----|-------|-----|----------|
| 49k | 192   | 185 | GTTATGAA |
| 49k | 60    | 53  | ATGTGGAA |
